# Supplementary material
Source: PubMed Central journal article supplement (PMC4025918)
Supplement: NIHMS572529-supplement-01.pdf [file NIHMS572529-supplement-01.pdf]

**Supporting Information**

Additional Supporting Information may be found in the online version of this article:

**Table S1.** Correlations between endotoxin concentrations at 1 month for five home.

**Table S2.** Correlations between endotoxin concentrations at 1 month for each of the five home locations stratified by the absence or presence of rugs on both the living room and child's bedroom floors.

**Table S3.** Correlations between endotoxin concentrations from each of the five locations

Studied at 1- and 6 months, stratified by the season\* when the 1-month sample was obtained.

**Table S4.** Published studies evaluating home endotoxin concentrations in relationship to presence or severity of allergic disease or allergic sensitization in children.

Please note: Wiley-Blackwell are not responsible for the content or functionality of any supporting materials supplied by the authors. Any queries (other than missing material) should be directed to the corresponding author for the article.
